# Supplementary material for: Skin Blood Perfusion and Oxygenation Colour Affect Perceived Human Health
Source: PubMed Central journal article supplement (PMC2659803; doi:10.1371/journal.pone.0005083), 2009-04-01
Supplement: pone.0005083.s002.pdf [file pone.0005083.s002.pdf]

| Transform          | $\Delta L^*$<br>component | $\Delta a^*$<br>component | $\Delta b^*$<br>component | Total colour<br>change ( $\Delta E$ ) |
|--------------------|---------------------------|---------------------------|---------------------------|---------------------------------------|
| Oxygenated blood   | 0.57±0.05                 | 1.36±0.12                 | -0.04±0.00                | 1.52±0.13                             |
| Deoxygenated blood | -0.39±0.14                | 0.34±0.12                 | -0.12±0.04                | 0.51±0.19                             |

**Table S2. Colour changes along component CIELab axes and total colour change ( $\Delta E$ ).**

Mean change across participants and faces ( $\pm$ SE) in the single-axis pigment transforms to maximize health.
