# Supplementary material for: Skin Blood Perfusion and Oxygenation Colour Affect Perceived Human Health
Source: PubMed Central journal article supplement (PMC2659803; doi:10.1371/journal.pone.0005083), 2009-04-01
Supplement: pone.0005083.s003.pdf [file pone.0005083.s003.pdf]

| Participant ID | Trial type                          |                                     |                                     |
|----------------|-------------------------------------|-------------------------------------|-------------------------------------|
|                | Deoxygenated                        | Oxygenated                          | Cross-Cultural                      |
|                | $F_{29,1410}=1.069$ ;<br>$p=0.367$  | $F_{29,1410}=1.418$ ;<br>$p=0.070$  | $F_{37,1748}=3.256$ ;<br>$p<0.001$  |
| <b>L*</b>      | $F_{1,1410}=0.110$ ;<br>$p=0.740$   | $F_{1,1410}=0.148$ ;<br>$p=0.700$   | $F_{1,1748}=19.527$ ;<br>$p<0.001$  |
| <b>a*</b>      | $F_{1,1410}=279.782$ ;<br>$p<0.001$ | $F_{1,1410}=237.100$ ;<br>$p<0.001$ | $F_{1,1748}=187.272$ ;<br>$p<0.001$ |
| <b>b*</b>      | $F_{1,1410}=34.400$ ;<br>$p<0.001$  | $F_{1,1410}=2.416$ ;<br>$p=0.120$   | $F_{1,1748}=0.682$ ;<br>$p=0.409$   |
| <b>ID*L*</b>   | $F_{29,1410}=0.895$ ;<br>$p=0.627$  | $F_{29,1410}=1.352$ ;<br>$p=0.101$  | $F_{37,1748}=4.387$ ;<br>$p<0.001$  |
| <b>ID*a*</b>   | $F_{29,1410}=1.579$ ;<br>$p=0.026$  | $F_{29,1410}=2.057$ ;<br>$p=0.001$  | $F_{37,1748}=2.211$ ;<br>$p<0.001$  |
| <b>ID*b*</b>   | $F_{29,1410}=0.970$ ;<br>$p=0.511$  | $F_{29,1410}=0.780$ ;<br>$p=0.793$  | $F_{37,1748}=1.636$ ;<br>$p=0.010$  |

**Table S3. Effects of participant ID and initial face colour on colour change applied to optimise healthy appearance.**
