# Supplementary material for: Skin Blood Perfusion and Oxygenation Colour Affect Perceived Human Health
Source: PubMed Central journal article supplement (PMC2659803; doi:10.1371/journal.pone.0005083), 2009-04-01
Supplement: pone.0005083.s005.pdf [file pone.0005083.s005.pdf]

| Colour axis                          | Colour change in 2D blood trials |           |
|--------------------------------------|----------------------------------|-----------|
|                                      | Significance                     | Mean+SE   |
| $\Delta L^*$                         | $t_{50}=44.659; p<0.001$         | 1.53+0.03 |
| $\Delta a^*$                         | $t_{50}=54.343; p<0.001$         | 2.21+0.04 |
| $\Delta b^*$                         | $t_{50}=7.356; p<0.001$          | 0.06+0.01 |
| <b>Overall <math>\Delta E</math></b> | $t_{50}=64.033; p<0.001$         | 2.70+0.04 |

**Table S5. Overall CIELab and  $\Delta E$  colour change in two-dimensional pigment trials.**
