# Supplementary material for: Skin Blood Perfusion and Oxygenation Colour Affect Perceived Human Health
Source: PubMed Central journal article supplement (PMC2659803; doi:10.1371/journal.pone.0005083), 2009-04-01
Supplement: pone.0005083.s006.pdf [file pone.0005083.s006.pdf]

| Term                                  | Statistics                       |
|---------------------------------------|----------------------------------|
| Face Ethnicity                        | $F_{2,2.95}=0.602$ ; $p=0.604$   |
| Participant Ethnicity                 | $F_{1,21.039}=0.133$ ; $p=0.719$ |
| Face Ethnicity*Participant Ethnicity  | $F_{2,1551}=8.230$ ; $p<0.001$   |
| Participant ID(Participant Ethnicity) | $F_{36,1551}=28.070$ ; $p<0.001$ |
| L*                                    | $F_{1,1551}=11.856$ ; $p=0.001$  |
| a*                                    | $F_{1,1551}=81.554$ ; $p<0.001$  |
| b*                                    | $F_{1,1551}=1.225$ ; $p=0.269$   |

**Table S6. Effects of face ethnicity and participant ethnicity of colour change applied in the cross-cultural study.**
