# Supplementary material for: Skin Blood Perfusion and Oxygenation Colour Affect Perceived Human Health
Source: PLOS journal article supplement (doi:10.1371/journal.pone.0005083), 2009-03-31
Supplement: S4 (10.1371/journal.pone.0005083.s004) [file journal.pone.0005083.s004]

|                                 | Trial Type                          |                                     |
|---------------------------------|-------------------------------------|-------------------------------------|
|                                 | Oxygenated                          | Deoxygenated                        |
| Face Sex                        | $F_{1,1495}=4.095$ ;<br>$p=0.043$   | $F_{1,1495}=4.870$ ;<br>$p=0.027$   |
| Participant Sex                 | $F_{1,28.10}=1.533$ ;<br>$p=0.226$  | $F_{1,28.07}=1.038$ ;<br>$p=0.317$  |
| Face Sex*Participant Sex        | $F_{1,1495}=0.028$ ;<br>$p=0.867$   | $F_{1,1495}=0.092$ ;<br>$p=0.762$   |
| Participant ID(Participant sex) | $F_{28,1495}=18.563$ ;<br>$p<0.001$ | $F_{28,1495}=24.869$ ;<br>$p<0.001$ |
| L*                              | $F_{1,1495}=1.506$ ;<br>$p=0.220$   | $F_{1,1495}=0.430$ ;<br>$p=0.512$   |
| a*                              | $F_{1,1495}=222.342$ ;<br>$p<0.001$ | $F_{1,1495}=279.296$ ;<br>$p<0.001$ |
| b*                              | $F_{1,1495}=4.841$ ;<br>$p=0.028$   | $F_{1,1495}=20.445$ ;<br>$p<0.001$  |

**Table S4. Model effects of the analysis of face sex and participant sex on amount of colour change applied.** An effect of participant ID was found for oxygenated and deoxygenated trials, suggesting that participants behave differently from each other. 70% of participants increase deoxygenated blood colouration and 97% of participants increase oxygenated blood colouration in faces to optimise healthy appearance.
