# Supplementary material for: Skin Blood Perfusion and Oxygenation Colour Affect Perceived Human Health
Source: PLoS One. 2009 Apr 1;4(4):e5083. doi: 10.1371/journal.pone.0005083 (PMC2659803; doi:10.1371/journal.pone.0005083)
Supplement: Table S1 — Colour transform applied to produce the high colour endpoint image. The sign is changed for the low colour endpoint image. (0.02 MB PDF) [file pone.0005083.s001.pdf]

|                           | L*    | a*    | b*    | Colour<br>change ( $\Delta E$ ) |
|---------------------------|-------|-------|-------|---------------------------------|
| Oxygenated blood colour   | +2.25 | +5.36 | -0.17 | 5.81                            |
| Deoxygenated blood colour | -4.98 | +4.29 | -1.57 | 6.75                            |

**Table S1. Colour transform applied to produce the high colour endpoint image.**

The sign is changed for the low colour endpoint image.
